# Supplementary material for: Use of a leaf chlorophyll content index to improve the prediction of above-ground biomass and productivity
Source: PeerJ. 2019 Jan 11;6:e6240. doi: 10.7717/peerj.6240 (PMC6330949; doi:10.7717/peerj.6240)
Supplement: Supplemental Information 1 [file peerj-07-6240-s001.xlsx]

## Sheet: Figure1_2016-2017solar data
Date	solar radiation_MJ/m2
1/1/2016	6.35
2/1/2016	3.14
3/1/2016	9.68
4/1/2016	5.66
5/1/2016	0.92
6/1/2016	1.38
7/1/2016	1.03
8/1/2016	3.19
9/1/2016	0.94
10/1/2016	0.72
11/1/2016	1.09
12/1/2016	0.71
13/1/2016	1.21
14/1/2016	1.09
15/1/2016	2.92
16/1/2016	1.46
17/1/2016	11.7
18/1/2016	12.77
19/1/2016	7.06
20/1/2016	0.58
21/1/2016	2.06
22/1/2016	1.08
23/1/2016	14.01
24/1/2016	15.74
25/1/2016	17.09
26/1/2016	7.28
27/1/2016	4.79
28/1/2016	1.23
29/1/2016	1.51
30/1/2016	5.99
31/1/2016	1.37
1/2/2016	1.61
2/2/2016	9.21
3/2/2016	6.44
4/2/2016	3.57
5/2/2016	14.35
6/2/2016	16.2
7/2/2016	17
8/2/2016	17.37
9/2/2016	16.59
10/2/2016	8.24
11/2/2016	5.16
12/2/2016	13.33
13/2/2016	1.91
14/2/2016	1.61
15/2/2016	12.06
16/2/2016	15.36
17/2/2016	17.56
18/2/2016	17.58
19/2/2016	9.22
20/2/2016	16.24
21/2/2016	1.28
22/2/2016	2.52
23/2/2016	2.74
24/2/2016	11.69
25/2/2016	3.61
26/2/2016	10.69
27/2/2016	18.42
28/2/2016	19.69
29/2/2016	19.59
1/3/2016	18.32
2/3/2016	17.76
3/3/2016	10.51
4/3/2016	15.95
5/3/2016	1.84
6/3/2016	14.84
7/3/2016	9.07
8/3/2016	1.06
9/3/2016	1.61
10/3/2016	5.6
11/3/2016	15.11
12/3/2016	4.75
13/3/2016	2.82
14/3/2016	19.51
15/3/2016	4.78
16/3/2016	4.18
17/3/2016	4.25
18/3/2016	17.34
19/3/2016	19.8
20/3/2016	3.41
21/3/2016	1.79
22/3/2016	2.74
23/3/2016	2.67
24/3/2016	8.4
25/3/2016	20.73
26/3/2016	7.23
27/3/2016	23.04
28/3/2016	23.68
29/3/2016	1.77
30/3/2016	2.89
31/3/2016	14.93
1/4/2016	10.15
2/4/2016	11.9
3/4/2016	2.03
4/4/2016	8.86
5/4/2016	12.59
6/4/2016	3.46
7/4/2016	4.55
8/4/2016	7.03
9/4/2016	1.87
10/4/2016	5.2
11/4/2016	21.05
12/4/2016	8.83
13/4/2016	22.48
14/4/2016	10.21
15/4/2016	9.35
16/4/2016	17.43
17/4/2016	3.24
18/4/2016	24.34
19/4/2016	11.51
20/4/2016	3.52
21/4/2016	19.8
22/4/2016	3.94
23/4/2016	5.54
24/4/2016	11.28
25/4/2016	3.74
26/4/2016	2.34
27/4/2016	18.76
28/4/2016	22.37
29/4/2016	16.86
30/4/2016	24.02
1/5/2016	13.59
2/5/2016	8.13
3/5/2016	24.36
4/5/2016	10.97
5/5/2016	15.04
6/5/2016	11.47
7/5/2016	3.68
8/5/2016	5.1
9/5/2016	1.6
10/5/2016	24.75
11/5/2016	27.24
12/5/2016	27.86
13/5/2016	24.14
14/5/2016	16.6
15/5/2016	11.26
16/5/2016	23.18
17/5/2016	21.04
18/5/2016	5.42
19/5/2016	2
20/5/2016	3.24
21/5/2016	7.02
22/5/2016	5.34
23/5/2016	7
24/5/2016	9.87
25/5/2016	2.77
26/5/2016	2.43
27/5/2016	6.36
28/5/2016	4.34
29/5/2016	13.2
30/5/2016	20.38
31/5/2016	23.44
1/6/2016	12.7
2/6/2016	3.6
3/6/2016	7.77
4/6/2016	27.05
5/6/2016	27.76
6/6/2016	27.63
7/6/2016	17.1
8/6/2016	24.39
9/6/2016	22.91
10/6/2016	15.15
11/6/2016	5.07
12/6/2016	6.75
13/6/2016	22.34
14/6/2016	23.59
15/6/2016	3.16
16/6/2016	26.37
17/6/2016	29.93
18/6/2016	11.95
19/6/2016	19.01
20/6/2016	12.67
21/6/2016	20.82
22/6/2016	24.93
23/6/2016	27.49
24/6/2016	21.53
25/6/2016	4.21
26/6/2016	14.71
27/6/2016	6.68
28/6/2016	18.05
29/6/2016	8.5
30/6/2016	13.55
1/7/2016	7.02
2/7/2016	8.15
3/7/2016	4.59
4/7/2016	2.62
5/7/2016	10.37
6/7/2016	16.93
7/7/2016	23.1
8/7/2016	18.97
9/7/2016	27.03
10/7/2016	20.27
11/7/2016	25.73
12/7/2016	22.41
13/7/2016	13.21
14/7/2016	17.99
15/7/2016	17.28
16/7/2016	12.11
17/7/2016	6.89
18/7/2016	8.76
19/7/2016	15.42
20/7/2016	13.81
21/7/2016	17.59
22/7/2016	27.25
23/7/2016	27.97
24/7/2016	27.88
25/7/2016	27.7
26/7/2016	27.21
27/7/2016	24
28/7/2016	27.09
29/7/2016	27.88
30/7/2016	27.2
31/7/2016	20.58
1/8/2016	24.42
2/8/2016	15.06
3/8/2016	14.97
4/8/2016	17.52
5/8/2016	14.8
6/8/2016	17.13
7/8/2016	8.14
8/8/2016	19.42
9/8/2016	16.7
10/8/2016	20.16
11/8/2016	25.8
12/8/2016	19.08
13/8/2016	22.82
14/8/2016	18.11
15/8/2016	20.8
16/8/2016	23.82
17/8/2016	19.67
18/8/2016	22.65
19/8/2016	23.76
20/8/2016	17.04
21/8/2016	22.6
22/8/2016	13.06
23/8/2016	14.47
24/8/2016	18.16
25/8/2016	20.35
26/8/2016	4.3
27/8/2016	3.09
28/8/2016	25.84
29/8/2016	25.21
30/8/2016	21.37
31/8/2016	3.89
1/9/2016	15.54
2/9/2016	22.74
3/9/2016	18.21
4/9/2016	11.03
5/9/2016	9.54
6/9/2016	13.23
7/9/2016	20.84
8/9/2016	16.06
9/9/2016	8.12
10/9/2016	1.96
11/9/2016	13.19
12/9/2016	15.8
13/9/2016	22.39
14/9/2016	21.48
15/9/2016	16.36
16/9/2016	17.13
17/9/2016	18.89
18/9/2016	20.81
19/9/2016	20.4
20/9/2016	15.31
21/9/2016	17.39
22/9/2016	21.53
23/9/2016	20.97
24/9/2016	20.42
25/9/2016	19.75
26/9/2016	18.45
27/9/2016	3.29
28/9/2016	3.61
29/9/2016	2.99
30/9/2016	2.85
1/10/2016	2.98
2/10/2016	12.34
3/10/2016	17.53
4/10/2016	16.53
5/10/2016	18.43
6/10/2016	18.3
7/10/2016	6.52
8/10/2016	6.58
9/10/2016	15.06
10/10/2016	18.9
11/10/2016	9.81
12/10/2016	2.23
13/10/2016	1.95
14/10/2016	5.34
15/10/2016	7.86
16/10/2016	7.68
17/10/2016	10.77
18/10/2016	5.89
19/10/2016	1.52
20/10/2016	2.85
21/10/2016	6.13
22/10/2016	2.73
23/10/2016	2.56
24/10/2016	3.03
25/10/2016	2.26
26/10/2016	2.17
27/10/2016	6.55
28/10/2016	1.36
29/10/2016	1.45
30/10/2016	4.27
31/10/2016	2.5
1/11/2016	1.69
2/11/2016	9.62
3/11/2016	12.09
4/11/2016	17.08
5/11/2016	15.5
6/11/2016	9.22
7/11/2016	0.81
8/11/2016	1.5
9/11/2016	1.49
10/11/2016	13.78
11/11/2016	14.18
12/11/2016	2.72
13/11/2016	3.64
14/11/2016	2.72
15/11/2016	1.04
16/11/2016	2.03
17/11/2016	2.06
18/11/2016	4.38
19/11/2016	3.37
20/11/2016	1.45
21/11/2016	3.24
22/11/2016	1.19
23/11/2016	1.26
24/11/2016	3.9
25/11/2016	2.17
26/11/2016	14.69
27/11/2016	15.03
28/11/2016	14.86
29/11/2016	4.04
30/11/2016	5.89
1/12/2016	9.75
2/12/2016	7.32
3/12/2016	3.38
4/12/2016	10.4
5/12/2016	13.98
6/12/2016	13.83
7/12/2016	13.23
8/12/2016	13.16
9/12/2016	13.97
10/12/2016	11.53
11/12/2016	3.29
12/12/2016	0.79
13/12/2016	1.54
14/12/2016	1.75
15/12/2016	11.17
16/12/2016	13.16
17/12/2016	12.66
18/12/2016	7.46
19/12/2016	0.95
20/12/2016	1.15
21/12/2016	0.82
22/12/2016	12.63
23/12/2016	6.27
24/12/2016	1.18
25/12/2016	0.55
26/12/2016	1.45
27/12/2016	13.09
28/12/2016	7.18
29/12/2016	12.79
30/12/2016	12.34
31/12/2016	8.49
1/1/2017	6.68
2/1/2017	3.95
3/1/2017	3.18
4/1/2017	7.25
5/1/2017	0.66
6/1/2017	0.66
7/1/2017	1.07
8/1/2017	2.24
9/1/2017	2.69
10/1/2017	0.62
11/1/2017	0.92
12/1/2017	3.17
13/1/2017	9.73
14/1/2017	3.58
15/1/2017	4.41
16/1/2017	4.29
17/1/2017	2.36
18/1/2017	1.45
19/1/2017	1.98
20/1/2017	14.13
21/1/2017	13.4
22/1/2017	14.53
23/1/2017	14.49
24/1/2017	3.77
25/1/2017	11.04
26/1/2017	14.98
27/1/2017	11.28
28/1/2017	11.01
29/1/2017	2.07
30/1/2017	4.21
31/1/2017	5.45
1/2/2017	0.65
2/2/2017	1.71
3/2/2017	0.98
4/2/2017	2.26
5/2/2017	3.02
6/2/2017	2.54
7/2/2017	1.01
8/2/2017	5.11
9/2/2017	14.17
10/2/2017	8.45
11/2/2017	8.32
12/2/2017	18.87
13/2/2017	18.77
14/2/2017	16.43
15/2/2017	13.25
16/2/2017	15.76
17/2/2017	9.53
18/2/2017	5.49
19/2/2017	13.9
20/2/2017	8.43
21/2/2017	1.05
22/2/2017	3.59
23/2/2017	4.55
24/2/2017	9.29
25/2/2017	16.15
26/2/2017	19.73
27/2/2017	14.25
28/2/2017	13.15
1/3/2017	19.73
2/3/2017	19.5
3/3/2017	2.7
4/3/2017	1.23
5/3/2017	0.85
6/3/2017	7.89
7/3/2017	4.04
8/3/2017	17.25
9/3/2017	8.29
10/3/2017	2.98
11/3/2017	5.27
12/3/2017	1.44
13/3/2017	1.55
14/3/2017	7.81
15/3/2017	2.24
16/3/2017	2.82
17/3/2017	1.38
18/3/2017	2.05
19/3/2017	2.45
20/3/2017	3.97
21/3/2017	3.87
22/3/2017	2.16
23/3/2017	4.71
24/3/2017	1.82
25/3/2017	6.44
26/3/2017	22.4
27/3/2017	20.9
28/3/2017	1.53
29/3/2017	3.71
30/3/2017	1.87
31/3/2017	8.01
1/4/2017	23.0607
2/4/2017	22.5625
3/4/2017	10.5853
4/4/2017	16.3791
5/4/2017	8.94395
6/4/2017	8.98304
7/4/2017	9.02157
8/4/2017	9.05953
9/4/2017	9.09691
10/4/2017	9.1337
11/4/2017	9.16989
12/4/2017	12.9987
13/4/2017	23.4141
14/4/2017	22.5915
15/4/2017	12.3861
16/4/2017	9.34181
17/4/2017	9.37435
18/4/2017	18.5274
19/4/2017	15.4764
20/4/2017	9.46826
21/4/2017	9.49831
22/4/2017	21.6437
23/4/2017	25.2335
24/4/2017	22.6111
25/4/2017	9.61228
26/4/2017	9.63922
27/4/2017	9.66553
28/4/2017	20.9755
29/4/2017	25.6134
30/4/2017	23.7147
1/5/2017	9.76461
2/5/2017	9.78786
3/5/2017	9.8105
4/5/2017	19.2159
5/5/2017	21.0289
6/5/2017	20.1592
7/5/2017	9.89509
8/5/2017	9.91477
9/5/2017	26.0437
10/5/2017	21.2912
11/5/2017	15.9391
12/5/2017	20.8822
13/5/2017	27.1688
14/5/2017	27.6342
15/5/2017	10.0366
16/5/2017	25.2781
17/5/2017	27.3827
18/5/2017	24.411
19/5/2017	10.0943
20/5/2017	10.1074
21/5/2017	10.12
22/5/2017	10.132
23/5/2017	10.1436
24/5/2017	17.764
25/5/2017	19.2655
26/5/2017	27.329
27/5/2017	27.6343
28/5/2017	28.2372
29/5/2017	26.1556
30/5/2017	13.9379
31/5/2017	10.2191
1/6/2017	10.2265
2/6/2017	22.4498
3/6/2017	23.3477
4/6/2017	10.2459
5/6/2017	10.2515
6/6/2017	10.2567
7/6/2017	22.0198
8/6/2017	25.2958
9/6/2017	20.9822
10/6/2017	12.5046
11/6/2017	10.2764
12/6/2017	10.2791
13/6/2017	10.2814
14/6/2017	10.2833
15/6/2017	10.2848
16/6/2017	10.2859
17/6/2017	24.8486
18/6/2017	22.4698
19/6/2017	15.1891
20/6/2017	11.3262
21/6/2017	10.2856
22/6/2017	17.264
23/6/2017	10.2828
24/6/2017	10.2808
25/6/2017	10.2784
26/6/2017	10.2756
27/6/2017	10.2725
28/6/2017	10.2689
29/6/2017	10.265
30/6/2017	10.2606
1/7/2017	10.2559
2/7/2017	16.1873
3/7/2017	23.8988
4/7/2017	23.7442
5/7/2017	25.0732
6/7/2017	26.4018
7/7/2017	25.8009
8/7/2017	19.1154
9/7/2017	10.2037
10/7/2017	13.46
11/7/2017	14.3415
12/7/2017	26.2034
13/7/2017	23.3742
14/7/2017	27.9638
15/7/2017	28.9916
16/7/2017	29.1285
17/7/2017	29.1165
18/7/2017	27.3234
19/7/2017	29.5356
20/7/2017	26.4064
21/7/2017	29.3587
22/7/2017	29.1951
23/7/2017	25.7678
24/7/2017	28.4207
25/7/2017	27.3652
26/7/2017	26.4575
27/7/2017	27.921
28/7/2017	22.2694
29/7/2017	23.435
30/7/2017	22.6736
31/7/2017	11.1006
1/8/2017	9.8971
2/8/2017	20.0906
3/8/2017	26.1337
4/8/2017	25.9596
5/8/2017	25.6366
6/8/2017	26.4951
7/8/2017	26.4655
8/8/2017	23.9248
9/8/2017	12.0893
10/8/2017	18.2583
11/8/2017	9.68069
12/8/2017	9.65599
13/8/2017	11.3969
14/8/2017	9.60488
15/8/2017	15.8977
16/8/2017	18.2148
17/8/2017	24.1945
18/8/2017	27.5238
19/8/2017	27.3309
20/8/2017	26.9906
21/8/2017	25.4806
22/8/2017	26.1615
23/8/2017	24.9443
24/8/2017	23.874
25/8/2017	26.0039
26/8/2017	20.1401
27/8/2017	16.3212
28/8/2017	26.1222
29/8/2017	23.4595
30/8/2017	9.11267
31/8/2017	9.07703
1/9/2017	12.7807
2/9/2017	13.886
3/9/2017	8.96678
4/9/2017	8.92894
5/9/2017	8.89056
6/9/2017	8.85167
7/9/2017	15.6363
8/9/2017	22.1069
9/9/2017	17.9319
10/9/2017	14.1982
11/9/2017	8.64956
12/9/2017	8.60768
13/9/2017	8.56534
14/9/2017	12.7169
15/9/2017	24.2362
16/9/2017	23.7324
17/9/2017	22.675
18/9/2017	22.8662
19/9/2017	8.30227
20/9/2017	8.25705
21/9/2017	8.21146
22/9/2017	8.16554
23/9/2017	8.11929
24/9/2017	15.2664
25/9/2017	21.2833
26/9/2017	23.7528
27/9/2017	7.93138
28/9/2017	7.88375
29/9/2017	7.83591
30/9/2017	15.0985
1/10/2017	22.1744
2/10/2017	7.69124
3/10/2017	7.6427
4/10/2017	7.59403
5/10/2017	7.54526
6/10/2017	10.4839
7/10/2017	7.4475
8/10/2017	7.39854
9/10/2017	14.5347
10/10/2017	11.3893
11/10/2017	7.25163
12/10/2017	7.20272
13/10/2017	7.15388
14/10/2017	7.10513
15/10/2017	7.05648
16/10/2017	7.00798
17/10/2017	6.95962
18/10/2017	6.91145
19/10/2017	6.86347
20/10/2017	15.0083
21/10/2017	14.1932
22/10/2017	6.72098
23/10/2017	6.67403
24/10/2017	13.2303
25/10/2017	6.5811
26/10/2017	13.9098
27/10/2017	17.6188
28/10/2017	19.1719
29/10/2017	13.6724
30/10/2017	17.5642
31/10/2017	17.3524
1/11/2017	17.2581
2/11/2017	17.5102
3/11/2017	16.9576
4/11/2017	6.14132
5/11/2017	17.004
6/11/2017	6.05953
7/11/2017	6.01953
8/11/2017	12.7039
9/11/2017	16.0941
10/11/2017	5.90339
11/11/2017	5.86602
12/11/2017	5.82935
13/11/2017	5.79339
14/11/2017	5.75818
15/11/2017	5.72371
16/11/2017	5.69002
17/11/2017	5.6571
18/11/2017	5.62499
19/11/2017	5.5937
20/11/2017	5.56324
21/11/2017	5.53362
22/11/2017	5.50486
23/11/2017	13.2844
24/11/2017	7.55289
25/11/2017	5.42386
26/11/2017	13.7555
27/11/2017	14.5383
28/11/2017	5.35105
29/11/2017	5.32866
30/11/2017	5.30722
1/12/2017	5.28674
2/12/2017	5.26724
3/12/2017	5.24872
4/12/2017	10.1371
5/12/2017	13.0673
6/12/2017	7.53991
7/12/2017	5.18463
8/12/2017	13.7896
9/12/2017	13.3579
10/12/2017	13.8393
11/12/2017	14.4224
12/12/2017	5.12753
13/12/2017	5.11924
14/12/2017	5.11199
15/12/2017	5.10581
16/12/2017	9.72109
17/12/2017	14.2321
18/12/2017	14.5267
19/12/2017	13.9205
20/12/2017	14.3201
21/12/2017	14.4211
22/12/2017	8.00224
23/12/2017	5.09457
24/12/2017	13.5341
25/12/2017	14.0464
26/12/2017	13.4556
27/12/2017	5.11454
28/12/2017	5.12219
29/12/2017	5.13089
30/12/2017	5.14064
31/12/2017	12.7407

## Sheet: Figure2_CCI_LAI_PARi
		CCI				LAI				PARi
year_crop	treatments	T	B	F	M	T	B	F	M
2016earlyrice	T1	17.04	21.9	34.46	18.325	0.36483	1.59301	1.48254	0.530709	58.1022	134.319	196.318	241.453
2016earlyrice	T1	16.16	24.9	39.1	16.35	0.649346	1.45712	1.31515	0.623252	64.7335	144.33	209.065	257.036
2016earlyrice	T1	20.26	28.92	35.68	13	0.795843	1.32122	1.24667	0.438166	63.6386	133.946	182.646	199.499
2016earlyrice	T2	33.78	52.1	54.5	39.8	0.696148	3.64415	3.67753	1.35706	106.679	236.529	346.497	442.493
2016earlyrice	T2	35.8	57	60.3	41.425	0.851762	3.16891	3.65785	1.01841	100.728	221.312	319.439	394.35
2016earlyrice	T2	35.42	53.02	60.64	31.325	1.00738	2.69368	2.78986	1.21233	95.6083	210.246	305.284	382.105
2016earlyrice	T3	30.46	33.88	44.58	19.275	0.598174	2.78861	3.21212	0.976647	90.3734	204.645	300.163	378.441
2016earlyrice	T3	34.14	45.64	53.88	31.225	0.838539	2.84158	2.83221	0.695309	102.69	224.343	325.17	407.418
2016earlyrice	T3	35.82	48.12	51.48	18.325	0.718356	2.89455	2.7391	0.648975	99.5825	218.852	317.203	395.783
2016earlyrice	T4	27.46	36.48	45.22	23.325	0.786925	3.17666	1.85304	1.16315	102.124	226.652	331.075	419.133
2016earlyrice	T4	34.406	34.9	46.54	21.425	0.824357	2.85457	1.6389	1.35477	85.646	189.357	274.62	341.052
2016earlyrice	T4	25.28	44.74	49.58	21.95	0.849621	2.53248	2.06718	1.57562	78.7818	177.973	261.372	329.785
2016earlyrice	T5	30	41.68	52.34	17.925	0.783172	4.28153	2.85941	1.0397	118.867	255.615	368.936	463.807
2016earlyrice	T5	35.76	43.36	41.18	20.0125	0.811341	4.04449	2.99101	0.765334	114.022	243.821	348.856	428.58
2016earlyrice	T5	29.06	49.12	54.14	22.1	1.08495	3.80745	2.72781	0.950653	118.953	251.951	361.725	452.277
2016earlyrice	T6	31.72	47.22	54.74	35.525	1.01599	4.44343	4.30899	1.07237	125.397	265.418	381.054	477.72
2016earlyrice	T6	32.86	52.2	54.34	22.825	0.948941	3.62612	3.18504	0.888166	112.578	241.656	347.352	431.338
2016earlyrice	T6	33.48	44.7	59.7	18.4	0.881896	2.80881	3.08662	1.16694	97.7505	216.892	317.071	401.551
2016earlyrice	T7	70.46	39.18	42.64	31.8	0.571329	4.15243	3.55085	0.777189	110.661	240.353	345.781	426.802
2016earlyrice	T7	31.56	40.78	53.58	22.275	0.680319	3.80249	2.8813	0.990246	109.002	237.679	344.739	433.987
2016earlyrice	T7	29.98	41.68	41.14	23.75	0.789309	3.45256	2.31944	0.564133	104.068	222.97	316.276	377.578
2016earlyrice	T8	35.26	48.68	60.76	44.15	0.775092	4.91145	3.90403	0.876863	124.934	264.362	378.371	469.93
2016earlyrice	T8	33.7	51.7	57.86	33.025	0.691468	4.11226	4.06439	0.966933	112.172	243.633	351.167	436.073
2016earlyrice	T8	34.32	46.48	61.04	29.75	0.657294	3.31307	4.02093	0.786792	107.476	236.923	345.129	436.422
2016earlyrice	T9	34.96	37.34	44.46	15.075	0.641311	3.30523	2.64021	0.893994	100.501	221.799	322.541	404.929
2016earlyrice	T9	36.46	47.62	45.26	19.025	0.709062	3.1406	2.9732	0.939559	99.2316	219.369	318.877	399.42
2016earlyrice	T9	28.68	32.04	45.82	20.25	0.776814	2.97597	2.96354	0.844367	100.075	220.231	319.618	399.843
2016laterice	T1	24.16	36.72	23.925	8.55	2.64634	3.03246	2.4152	2.04128	98.5535	205.823	332.847	395.896
2016laterice	T1	25.08	31.9	22.275	11.075	2.55383	6.17857	1.62333	2.17134	151.574	290.517	444.079	513.879
2016laterice	T1	24.62	34.4	17.875	8.725	2.73885	4.60551	1.75343	1.99605	122.048	242.358	373.876	426.365
2016laterice	T2	31.4	52.96	34.275	25.3	5.37738	5.34735	8.16308	7.61144	139.346	285.639	457.351	550.526
2016laterice	T2	33.62	58.58	44.525	34.275	5.37738	8.58694	6.67457	6.08349	175.461	331.752	505.664	596.233
2016laterice	T2	32.51	55.98	37.825	37.225	5.37738	6.96714	7.13379	5.79346	186.712	343.186	517.189	608.106
2016laterice	T3	33.075	50.42	27.35	20.2	3.16567	9.09834	7.76249	2.93003	168.287	325.105	497.082	579.832
2016laterice	T3	26.14	59.44	30.825	15.325	3.16567	8.41616	6.22081	4.0256	177.82	334.571	506.922	592.189
2016laterice	T3	29.6075	52.08	25.25	19.7	3.16567	3.86952	5.8151	3.71986	177.243	334.529	507.728	594.593
2016laterice	T4	29.24	54.58	29.725	17.65	4.69919	4.50957	4.97382	3.44576	158.519	303.154	467.729	553.163
2016laterice	T4	36.48	50.24	29.375	18.275	4.69919	4.15195	4.23069	4.32539	171.877	313.137	472.648	553.751
2016laterice	T4	32.86	47.2	29.4	22.65	4.69919	4.33076	6.8574	3.8492	172.546	323.614	493.6	582.28
2016laterice	T5	30.92	47.64	29.55	19.75	3.57937	5.5222	4.54404	3.34202	162.978	310.247	475.943	560.404
2016laterice	T5	36.82	57.8	31.05	22.775	4.13928	7.9857	3.6581	2.50343	189.024	343.917	511.103	582.042
2016laterice	T5	33.87	49.12	28.575	17.875	5.05807	6.75395	3.98389	3.58867	188.661	341.632	509.87	591.979
2016laterice	T6	35.24	53.1	39.35	23.8	5.33018	5.04368	7.32781	4.10354	153.935	303.482	472.976	561.644
2016laterice	T6	37.48	50.5	41.475	37.55	5.33018	4.53788	7.44744	7.39444	186.397	342.873	516.895	607.838
2016laterice	T6	36.36	56.42	39	33.95	5.33018	5.76471	6.13891	4.88261	175.217	326.952	498.235	588.625
2016laterice	T7	31.32	46.64	31.25	21.4	4.0258	6.06959	3.56558	2.82241	175.033	324.434	490.081	571.615
2016laterice	T7	30.16	50.56	34.025	26.725	2.95602	8.6738	6.73169	3.4483	164.647	321.406	494.647	582.064
2016laterice	T7	30.74	49.98	33	20.3	3.49091	4.11018	6.11031	3.84982	170.14	318.088	485.036	571.511
2016laterice	T8	42.54	55.7	39	32.5	5.48329	11.2511	7.10653	5.13228	198.905	361.03	538.115	628.289
2016laterice	T8	41.74	60.46	38.875	37.525	5.62214	7.83796	6.31862	5.77308	197.076	355.548	531.001	622.955
2016laterice	T8	42.14	52.7	37.25	32.9	5.55271	3.89856	9.53912	5.59671	137.222	277.12	443.144	533.517
2016laterice	T9	34.72	49.46	27.325	19.125	4.48704	7.73754	5.4134	4.14641	166.03	311.299	474.868	557.966
2016laterice	T9	34.64	50.78	33.65	20.6	5.14505	9.68208	5.48396	3.08984	186.209	341.8	511.527	590.913
2016laterice	T9	34.68	43.36	32.925	27.375	4.65701	8.70981	5.55451	3.53213	177.086	328.624	496.491	579.82
2017earlyrice	T1	8.36667	35.3455	24.275	3.6	0.531869	1.32122	1.18666	0.338037	63.0092	145.936	185.901	239.657
2017earlyrice	T1	9.25	28.3669	22.75	4.15	0.291945	1.23141	1.05855	0.573762	54.8257	135.591	180.05	280.578
2017earlyrice	T1	11.3	34.1355	19.775	4.1	0.306573	2.11292	0.812492	0.417046	75.0931	178.51	233.074	347.83
2017earlyrice	T2	9.96667	42.7855	36.975	19.9667	0.559861	2.36884	4.17988	0.793723	106.157	251.154	326.435	491.158
2017earlyrice	T2	14.3333	39.9891	33.625	18.725	0.764028	2.69368	2.14674	1.28636	96.0728	223.804	290.781	436.983
2017earlyrice	T2	16.2	51.4988	45.05	25.95	0.586468	2.09897	2.30994	1.95158	69.8606	175.369	234.006	374.073
2017earlyrice	T3	12.5	45.8938	36.575	7.6	0.461477	3.20155	2.12837	0.648975	95.4186	222.765	285.576	383.96
2017earlyrice	T3	15.85	46.755	39.6	6.4	0.668024	2.89455	4.29507	0.830102	111.464	259.293	334.397	485.154
2017earlyrice	T3	15.3667	50.4158	33.125	8.55	0.489892	5.1948	3.39181	0.0964942	132.384	293.91	373.376	504.755
2017earlyrice	T4	13.8	48.2493	39.825	9.76667	0.512218	3.48306	4.57189	0.478086	123.036	281.42	361.832	531.081
2017earlyrice	T4	16.9667	41.6806	31.8	7	0.555155	2.53248	2.49642	0.559544	95.316	223.513	288.404	409.013
2017earlyrice	T4	24.9333	52.248	39.925	10.05	0.712874	4.72012	3.89022	0.31671	135.337	299.063	380.692	538.692
2017earlyrice	T5	22	41.1455	38.225	9.15	0.705726	3.80745	5.03825	0.567772	128.498	289.882	370.864	531.908
2017earlyrice	T5	25.4667	51.621	35.85	6.475	0.767792	3.29969	2.82721	0.438911	114.521	259.189	331.395	462.54
2017earlyrice	T5	16.8	41.4193	34.6	6.06667	0.631273	6.35561	2.56355	0.950653	139.62	305.182	387.894	553.662
2017earlyrice	T6	18.7333	44.5537	41.125	32.6	0.861133	2.80881	2.90766	1.39949	106.375	246.334	319.795	486.073
2017earlyrice	T6	12.0333	41.412	39.85	28.3	0.385384	2.04259	2.73338	1.91584	69.3427	179.95	242.309	395.561
2017earlyrice	T6	14.7	41.0517	31.45	27.9	0.760701	2.63917	2.53449	0.565301	99.2032	228.01	291.449	391.936
2017earlyrice	T7	20.2	47.5283	33.375	5.525	0.526644	3.45256	3.18885	0.347365	111.002	255.25	326.565	444.005
2017earlyrice	T7	18.0333	38.8932	41.5	5.15	0.681686	4.10379	2.26572	0.403058	119.437	267.626	341.162	471.049
2017earlyrice	T7	19.6	37.0629	33.75	5	0.5808	3.28809	2.81189	0.572246	110.689	254.596	327.644	473.07
2017earlyrice	T8	17.6	42.0855	42.475	21.7667	0.529861	3.31307	3.08945	1.81559	99.1943	237.561	310.708	477.176
2017earlyrice	T8	10.6	35.2127	39.475	16.1	0.528461	2.6671	2.56971	0.769562	92.7834	219.207	283.046	398.852
2017earlyrice	T8	13.8333	47.1977	31.625	24.275	0.569061	2.31041	3.10668	1.50816	94.432	228.725	301.534	476.433
2017earlyrice	T9	19.2	41.5304	38.675	7.33333	0.524854	3.889	4.03528	0.578438	123.676	281.471	361.374	527.102
2017earlyrice	T9	19.5333	46.7333	33.55	6.36667	0.628133	2.52274	2.48308	0.618409	95.5516	223.052	287.336	404.5
2017earlyrice	T9	17.2333	48.2817	28.975	9.06667	0.494493	2.97597	3.90697	0.507735	110.775	258.165	333.015	482.457
2017laterice	T1	26.35	36.72	23.925	8.55	1.0522	3.22011	1.63711	1.49039	103.642	253.59	313.267	450.812
2017laterice	T1	25.2	31.9	22.275	11.075	1.05629	2.44153	1.34774	1.11401	92.3529	222.439	273.07	370.922
2017laterice	T1	20	34.4	17.875	8.725	1.47273	3.02085	0.899186	1.02664	120.282	271.34	330.361	460.292
2017laterice	T2	31.4	52.96	34.275	25.3	1.54397	3.70462	3.24528	1.40915	129.184	306.677	375.514	530.789
2017laterice	T2	33.8	58.58	44.525	34.275	1.60525	7.95333	5.36208	0.903841	160.403	364.757	441.412	583.302
2017laterice	T2	33.35	55.98	37.825	37.225	1.74533	6.70881	2.93553	1.19409	151.467	345.038	417.672	543.752
2017laterice	T3	32.68	50.42	27.35	20.2	1.9168	4.75605	3.88431	1.16861	143.388	331.17	401.961	527.72
2017laterice	T3	31.9333	59.44	30.825	15.325	1.86315	6.44838	2.74792	1.61755	155.63	350.246	424.258	585.269
2017laterice	T3	30.95	52.08	25.25	19.7	1.48457	4.69598	1.79046	1.22525	129.999	302.644	368.134	485.454
2017laterice	T4	29.24	54.58	29.725	17.65	2.99181	4.75726	3.33971	2.48862	167.818	359.773	433.299	609.335
2017laterice	T4	36.1	50.24	29.375	18.275	1.33289	5.13814	3.17758	1.32531	132.64	316.542	386.607	520.644
2017laterice	T4	37.05	47.2	29.4	22.65	1.88307	6.00924	3.10185	1.86301	151.431	344.024	417.467	578.956
2017laterice	T5	30.92	47.64	29.55	19.75	2.01646	3.60968	3.6574	1.92775	136.688	316.235	385.732	544.659
2017laterice	T5	38.7333	57.8	31.05	22.775	2.0539	5.7888	4.01007	2.04411	152.703	347.217	421.282	583.891
2017laterice	T5	33.95	49.12	28.575	17.875	2.57075	6.2182	2.25577	1.31543	167.902	362.257	435.366	573.607
2017laterice	T6	35.24	53.1	39.35	23.8	1.85722	4.00894	3.27783	2.72418	128.197	302.038	370.196	533.241
2017laterice	T6	36.4667	50.5	41.475	37.55	1.76288	5.65687	3.45869	2.23456	141.43	329.446	401.298	553.192
2017laterice	T6	39	56.42	39	33.95	1.37103	6.55652	5.86087	1.9162	149.854	351.461	428.107	608.302
2017laterice	T7	31.32	46.64	31.25	21.4	1.64	4.77617	3.16809	1.46414	137.377	321.178	391.407	533.928
2017laterice	T7	27.4333	50.56	34.025	26.725	1.21103	7.04029	4.54889	1.77964	143.41	340.533	415.204	562.355
2017laterice	T7	34.25	49.98	33	20.3	1.54494	6.67357	3.46422	1.91747	146.681	340.733	414.49	566.906
2017laterice	T8	42.54	55.7	39	32.5	2.28742	5.86464	2.77418	1.48835	159.601	352.471	425.416	570.044
2017laterice	T8	39.9	60.46	38.875	37.525	2.32047	5.74054	3.67753	1.38546	158.479	353.166	426.495	563.833
2017laterice	T8	44.5	52.7	37.25	32.9	1.17324	6.68266	5.84291	1.57339	148.563	350.353	426.962	601.888
2017laterice	T9	34.72	49.46	27.325	19.125	1.92664	4.11454	3.81358	1.59344	143.132	330.065	402.065	568.789
2017laterice	T9	34.0667	50.78	33.65	20.6	1.39037	4.77958	2.56474	2.56113	125.264	300.795	369.924	539.491
2017laterice	T9	35.5	43.36	32.925	27.375	1.53691	5.0795	3.70265	2.74015	136.789	324.553	397.886	583.769

## Sheet: Figure3 and 4
Year and crop types	stages	treatments	num	obs	sim_PARi	sim_PARi_CCI
2016 Early	T	T1	1	36.594	168.496	24.1949
2016 Early	T	T1	2	53.694	187.727	30.5168
2016 Early	T	T1	3	40.926	184.552	24.8205
2016 Early	T	T2	4	54.264	309.368	84.8398
2016 Early	T	T2	5	92.112	292.112	84.6749
2016 Early	T	T2	6	70.794	277.264	72.2746
2016 Early	T	T3	7	55.518	262.083	53.8761
2016 Early	T	T3	8	69.198	297.8	76.1728
2016 Early	T	T3	9	59.736	288.789	73.2149
2016 Early	T	T4	10	66.234	296.16	134.174
2016 Early	T	T4	11	61.104	248.373	117.187
2016 Early	T	T4	12	86.982	228.467	125.564
2016 Early	T	T5	13	67.146	344.714	173.269
2016 Early	T	T5	14	69.768	330.664	197.729
2016 Early	T	T5	15	61.332	344.962	168.822
2016 Early	T	T6	16	73.302	363.652	195.165
2016 Early	T	T6	17	79.116	326.475	182.144
2016 Early	T	T6	18	73.872	283.476	145.861
2016 Early	T	T7	19	48.45	320.916	153.343
2016 Early	T	T7	20	105.336	316.106	161.104
2016 Early	T	T7	21	60.192	301.797	142.693
2016 Early	T	T8	22	60.762	362.308	189.32
2016 Early	T	T8	23	62.814	325.298	189.073
2016 Early	T	T8	24	52.896	311.682	148.191
2016 Early	T	T9	25	60.762	291.454	152.077
2016 Early	T	T9	26	97.014	287.772	171.05
2016 Early	T	T9	27	59.394	290.219	133.061
2016 Early	B	T1	28	269.04	389.526	63.7139
2016 Early	B	T1	29	269.04	418.557	79.2996
2016 Early	B	T1	30	269.04	388.443	55.9279
2016 Early	B	T2	31	431.832	685.934	198.293
2016 Early	B	T2	32	431.832	641.805	195.353
2016 Early	B	T2	33	431.832	609.713	166.387
2016 Early	B	T3	34	313.88	593.469	130.305
2016 Early	B	T3	35	313.88	650.593	177.746
2016 Early	B	T3	36	313.88	634.67	168.04
2016 Early	B	T4	37	394.212	657.291	353.375
2016 Early	B	T4	38	394.212	549.136	295.352
2016 Early	B	T4	39	394.212	516.122	340.974
2016 Early	B	T5	40	502.816	741.285	470.028
2016 Early	B	T5	41	502.816	707.081	507.564
2016 Early	B	T5	42	502.816	730.657	452.45
2016 Early	B	T6	43	434.416	769.713	542.267
2016 Early	B	T6	44	434.416	700.802	491.827
2016 Early	B	T6	45	434.416	628.986	407.299
2016 Early	B	T7	46	520.296	697.023	429.781
2016 Early	B	T7	47	520.296	689.268	444.13
2016 Early	B	T7	48	520.296	646.614	372.384
2016 Early	B	T8	49	526.832	766.649	540.327
2016 Early	B	T8	50	526.832	706.535	537.544
2016 Early	B	T8	51	526.832	687.078	445.751
2016 Early	B	T9	52	492.404	643.217	403.901
2016 Early	B	T9	53	492.404	636.169	453.183
2016 Early	B	T9	54	492.404	638.671	365.763
2016 Early	F	T1	55	444.258	569.322	100.566
2016 Early	F	T1	56	394.098	606.289	125.657
2016 Early	F	T1	57	373.578	529.674	76.8181
2016 Early	F	T2	58	809.514	1004.84	295.578
2016 Early	F	T2	59	805.182	926.373	287.452
2016 Early	F	T2	60	614.118	885.323	242.137
2016 Early	F	T3	61	684.342	870.473	193.693
2016 Early	F	T3	62	603.402	942.994	264.567
2016 Early	F	T3	63	583.566	919.889	244.509
2016 Early	F	T4	64	937.878	960.118	532.283
2016 Early	F	T4	65	415.302	796.398	425.68
2016 Early	F	T4	66	523.83	757.979	516.531
2016 Early	F	T5	67	989.406	1069.91	708.527
2016 Early	F	T5	68	722.874	1011.68	759.585
2016 Early	F	T5	69	659.262	1049	665.122
2016 Early	F	T6	70	928.302	1105.06	831.497
2016 Early	F	T6	71	686.166	1007.32	737.112
2016 Early	F	T6	72	664.962	919.507	614.536
2016 Early	F	T7	73	691.638	1002.76	654.583
2016 Early	F	T7	74	561.222	999.744	676.015
2016 Early	F	T7	75	451.782	917.2	539.118
2016 Early	F	T8	76	860.358	1097.28	828.643
2016 Early	F	T8	77	895.698	1018.38	828.734
2016 Early	F	T8	78	886.122	1000.87	687.756
2016 Early	F	T9	79	623.694	935.369	608.886
2016 Early	F	T9	80	702.354	924.745	682.903
2016 Early	F	T9	81	700.074	926.891	560.955
2016 Early	M	T1	82	506.479	700.212	134.751
2016 Early	M	T1	83	558.235	745.405	170.397
2016 Early	M	T1	84	480.373	578.546	82.952
2016 Early	M	T2	85	992.917	1283.23	379.873
2016 Early	M	T2	86	744.283	1143.61	361.17
2016 Early	M	T2	87	1184.67	1108.1	295.803
2016 Early	M	T3	88	920.413	1097.48	241.616
2016 Early	M	T3	89	928.108	1181.51	338.192
2016 Early	M	T3	90	935.803	1147.77	299.157
2016 Early	M	T4	91	787.147	1215.49	662.922
2016 Early	M	T4	92	934.777	989.052	487.748
2016 Early	M	T4	93	990.067	956.377	643.38
2016 Early	M	T5	94	1017.54	1345.04	877.837
2016 Early	M	T5	95	926.17	1242.88	948.426
2016 Early	M	T5	96	834.799	1311.6	773.401
2016 Early	M	T6	97	1240.41	1385.39	1067.9
2016 Early	M	T6	98	1105.09	1250.88	902.302
2016 Early	M	T6	99	953.017	1164.5	752.262
2016 Early	M	T7	100	899.893	1237.73	818.779
2016 Early	M	T7	101	868.771	1258.56	850.256
2016 Early	M	T7	102	822.601	1094.98	611.311
2016 Early	M	T8	103	982.999	1362.8	1054.28
2016 Early	M	T8	104	849.277	1264.61	1068.5
2016 Early	M	T8	105	973.309	1265.63	864.871
2016 Early	M	T9	106	822.373	1174.29	758.775
2016 Early	M	T9	107	958.261	1158.32	852.972
2016 Early	M	T9	108	803.335	1159.54	714.305
2016Late	T	T1	217	118.104	285.805	120.83
2016Late	T	T1	218	178.752	439.564	189.21
2016Late	T	T1	219	210.9	353.94	232.417
2016Late	T	T2	220	227.316	404.102	113.629
2016Late	T	T2	221	266.76	508.835	222.684
2016Late	T	T2	222	272.916	541.465	331.739
2016Late	T	T3	223	162.906	488.031	85.1365
2016Late	T	T3	224	278.502	515.677	122.045
2016Late	T	T3	225	284.544	514.006	158.954
2016Late	T	T4	226	188.442	459.706	186.067
2016Late	T	T4	227	160.056	498.443	174.945
2016Late	T	T4	228	247.38	500.384	288.897
2016Late	T	T5	229	181.488	472.637	257.755
2016Late	T	T5	230	121.98	548.171	142.918
2016Late	T	T5	231	281.922	547.116	313.78
2016Late	T	T6	232	206.568	446.412	73.5313
2016Late	T	T6	233	227.772	540.55	333.552
2016Late	T	T6	234	310.422	508.13	107.481
2016Late	T	T7	235	167.238	507.594	282.673
2016Late	T	T7	236	165.528	477.475	72.9882
2016Late	T	T7	237	264.822	493.405	144.02
2016Late	T	T8	238	196.65	576.825	87.9881
2016Late	T	T8	239	337.326	571.521	294.193
2016Late	T	T8	240	224.58	397.943	142.137
2016Late	T	T9	241	273.486	481.487	257.825
2016Late	T	T9	242	255.93	540.007	225.249
2016Late	T	T9	243	270.408	513.548	306.504
2016Late	B	T1	244	679.212	596.886	333.178
2016Late	B	T1	245	618.564	842.5	421.503
2016Late	B	T1	246	648.888	702.839	458.345
2016Late	B	T2	247	619.476	828.353	501.042
2016Late	B	T2	248	954.636	962.081	396.435
2016Late	B	T2	249	787.056	995.24	726.739
2016Late	B	T3	250	724.584	942.804	523.413
2016Late	B	T3	251	621.528	970.256	424.444
2016Late	B	T3	252	673.056	970.134	478.707
2016Late	B	T4	253	685.824	879.146	541.832
2016Late	B	T4	254	680.124	908.098	503.122
2016Late	B	T4	255	682.974	938.48	672.021
2016Late	B	T5	256	492.936	899.717	640.516
2016Late	B	T5	257	713.868	997.359	566.532
2016Late	B	T5	258	603.402	990.733	701.343
2016Late	B	T6	259	706.8	880.098	464.384
2016Late	B	T6	260	545.148	994.331	732.615
2016Late	B	T6	261	625.974	948.162	499.694
2016Late	B	T7	262	532.152	940.858	671.5
2016Late	B	T7	263	831.06	932.078	504.142
2016Late	B	T7	264	681.606	922.457	499.099
2016Late	B	T8	265	735.756	1046.99	554.334
2016Late	B	T8	266	849.984	1031.09	743.287
2016Late	B	T8	267	792.87	803.647	525.421
2016Late	B	T9	268	855.228	902.768	678.457
2016Late	B	T9	269	961.02	991.219	668.183
2016Late	B	T9	270	908.124	953.01	683.386
2016Late	F	T1	271	876.66	965.257	567.12
2016Late	F	T1	272	760.836	1287.83	656.268
2016Late	F	T1	273	788.88	1084.24	689.282
2016Late	F	T2	274	1539.68	1326.32	961.293
2016Late	F	T2	275	1269.96	1466.43	883.86
2016Late	F	T2	276	1229.83	1499.85	1188.47
2016Late	F	T3	277	1234.85	1441.54	1002
2016Late	F	T3	278	1114.01	1470.07	906.588
2016Late	F	T3	279	974.7	1472.41	836.948
2016Late	F	T4	280	1201.33	1356.41	927.085
2016Late	F	T4	281	1026.23	1370.68	884.95
2016Late	F	T4	282	1430.7	1431.44	1087.37
2016Late	F	T5	283	1257.19	1380.23	1066.33
2016Late	F	T5	284	1166.9	1482.2	1020.51
2016Late	F	T5	285	1241.92	1478.62	1104.69
2016Late	F	T6	286	1604.66	1371.63	909.264
2016Late	F	T6	287	1393.76	1499	1199.05
2016Late	F	T6	288	1147.3	1444.88	955.972
2016Late	F	T7	289	776.34	1421.24	1097.84
2016Late	F	T7	290	1619.71	1434.48	979.355
2016Late	F	T7	291	562.476	1406.6	915.692
2016Late	F	T8	292	1193.35	1560.53	1062.08
2016Late	F	T8	293	1061.57	1539.9	1236.14
2016Late	F	T8	294	1331.29	1285.12	979.385
2016Late	F	T9	295	1760.16	1377.12	1131.63
2016Late	F	T9	296	1481.2	1483.43	1142.41
2016Late	F	T9	297	1202.24	1439.82	1102.38
2016Late	M	T1	298	1276	1148.1	647.655
2016Late	M	T1	299	1214.21	1490.25	711.847
2016Late	M	T1	300	1336.99	1236.46	755.989
2016Late	M	T2	301	2274.07	1596.53	1205.26
2016Late	M	T2	302	1922.84	1729.08	1125.71
2016Late	M	T2	303	2263.7	1763.51	1433.22
2016Late	M	T3	304	1610.36	1681.51	1209.71
2016Late	M	T3	305	1850.11	1717.35	1124.19
2016Late	M	T3	306	1821.83	1724.32	982.165
2016Late	M	T4	307	1973.57	1604.17	1065.17
2016Late	M	T4	308	2287.75	1605.88	1064.86
2016Late	M	T4	309	1959.6	1688.61	1250.08
2016Late	M	T5	310	1794.47	1625.17	1255.06
2016Late	M	T5	311	1522.47	1687.92	1179.78
2016Late	M	T5	312	1741.69	1716.74	1217.83
2016Late	M	T6	313	1908.25	1628.77	1120.19
2016Late	M	T6	314	2696.56	1762.73	1447.27
2016Late	M	T6	315	1818.98	1707.01	1189.08
2016Late	M	T7	316	1841.33	1657.68	1276.84
2016Late	M	T7	317	2096.12	1687.98	1194.64
2016Late	M	T7	318	1493.74	1657.38	1121.92
2016Late	M	T8	319	2010.05	1822.04	1305.51
2016Late	M	T8	320	2321.15	1806.57	1473.42
2016Late	M	T8	321	2461.83	1547.2	1218.06
2016Late	M	T9	322	1905.74	1618.1	1306.36
2016Late	M	T9	323	1528.4	1713.65	1315.5
2016Late	M	T9	324	2034.56	1681.48	1289.15
2017Early	T	T1	109	31.7034	182.727	48.0437
2017Early	T	T1	110	20.121	158.994	7.35571
2017Early	T	T1	111	21.0558	217.77	37.4208
2017Early	T	T2	112	33.288	307.856	50.866
2017Early	T	T2	113	42.4764	278.611	93.2209
2017Early	T	T2	114	32.376	202.596	70.7539
2017Early	T	T3	115	26.2542	276.714	100.847
2017Early	T	T3	116	35.4198	323.246	63.2192
2017Early	T	T3	117	35.2032	383.914	80.2389
2017Early	T	T4	118	28.4088	356.805	62.1049
2017Early	T	T4	119	40.071	276.416	84.0859
2017Early	T	T4	120	40.356	392.476	61.9551
2017Early	T	T5	121	40.926	372.643	70.5247
2017Early	T	T5	122	39.615	332.11	108.191
2017Early	T	T5	123	32.2962	404.897	112.553
2017Early	T	T6	124	43.32	308.488	90.1322
2017Early	T	T6	125	38.6232	201.094	50.4402
2017Early	T	T6	126	42.0888	287.689	66.4366
2017Early	T	T7	127	34.5192	321.904	76.3657
2017Early	T	T7	128	43.2402	346.367	105.675
2017Early	T	T7	129	41.382	320.998	84.5652
2017Early	T	T8	130	29.6172	287.664	72.5708
2017Early	T	T8	131	31.3044	269.072	49.1217
2017Early	T	T8	132	36.9132	273.853	85.7286
2017Early	T	T9	133	28.9674	358.661	49.1831
2017Early	T	T9	134	37.962	277.1	74.4952
2017Early	T	T9	135	32.1138	321.248	80.1856
2017Early	B	T1	136	154.812	423.216	165.593
2017Early	B	T1	137	144.552	393.213	44.33
2017Early	B	T1	138	235.752	517.678	135.077
2017Early	B	T2	139	265.164	728.346	321.975
2017Early	B	T2	140	344.28	649.03	337.28
2017Early	B	T2	141	191.52	508.571	312.937
2017Early	B	T3	142	301.188	646.019	394.561
2017Early	B	T3	143	295.716	751.949	384.907
2017Early	B	T3	144	433.428	852.338	457.969
2017Early	B	T4	145	320.112	816.119	420.301
2017Early	B	T4	146	249.432	648.187	325.787
2017Early	B	T4	147	378.024	867.282	441.138
2017Early	B	T5	148	409.944	840.656	427.335
2017Early	B	T5	149	409.26	751.648	429.887
2017Early	B	T5	150	509.58	885.028	495.918
2017Early	B	T6	151	281.808	714.368	370.892
2017Early	B	T6	152	222.984	521.855	260.388
2017Early	B	T6	153	286.368	661.23	279.717
2017Early	B	T7	154	324.672	740.226	370.086
2017Early	B	T7	155	421.8	776.114	419.378
2017Early	B	T7	156	319.656	738.328	347.979
2017Early	B	T8	157	403.104	688.926	362.151
2017Early	B	T8	158	220.476	635.7	261.187
2017Early	B	T8	159	239.856	663.302	344.828
2017Early	B	T9	160	404.7	816.265	357.928
2017Early	B	T9	161	231.876	646.851	310.165
2017Early	B	T9	162	240.312	748.679	372.164
2017Early	F	T1	163	290.472	539.112	222.196
2017Early	F	T1	164	224.808	522.146	45.5562
2017Early	F	T1	165	256.272	675.915	167.128
2017Early	F	T2	166	656.868	946.66	453.209
2017Early	F	T2	167	482.22	843.264	460.757
2017Early	F	T2	168	375.288	678.619	436.986
2017Early	F	T3	169	372.552	828.171	537.744
2017Early	F	T3	170	623.808	969.75	537.67
2017Early	F	T3	171	443.916	1082.79	633.457
2017Early	F	T4	172	561.564	1049.31	592.62
2017Early	F	T4	173	471.048	836.37	441.049
2017Early	F	T4	174	614.916	1104.01	613.775
2017Early	F	T5	175	671.688	1075.51	598.332
2017Early	F	T5	176	449.388	961.046	579.908
2017Early	F	T5	177	492.252	1124.89	678.292
2017Early	F	T6	178	494.532	927.407	512.383
2017Early	F	T6	179	559.74	702.695	372.089
2017Early	F	T6	180	402.192	845.203	376.049
2017Early	F	T7	181	476.52	947.037	501.932
2017Early	F	T7	182	458.052	989.369	569.858
2017Early	F	T7	183	466.26	950.168	471.243
2017Early	F	T8	184	639.54	901.054	504.464
2017Early	F	T8	185	424.308	820.833	358.273
2017Early	F	T8	186	456.684	874.447	478.868
2017Early	F	T9	187	706.8	1047.99	496.079
2017Early	F	T9	188	464.208	833.275	413.97
2017Early	F	T9	189	612.864	965.743	509.201
2017Early	M	T1	190	423	695.006	318.846
2017Early	M	T1	191	541.707	813.678	245.798
2017Early	M	T1	192	441.716	1008.71	172.75
2017Early	M	T2	193	751.844	1424.36	693.4
2017Early	M	T2	194	753.088	1267.25	735.999
2017Early	M	T2	195	793.388	1084.81	718.772
2017Early	M	T3	196	747.058	1113.48	825.952
2017Early	M	T3	197	771.944	1406.95	804.952
2017Early	M	T3	198	765.08	1463.79	915.31
2017Early	M	T4	199	712.404	1540.13	931.374
2017Early	M	T4	200	675.416	1186.14	640.858
2017Early	M	T4	201	770.456	1562.21	834.73
2017Early	M	T5	202	727.76	1542.53	928.445
2017Early	M	T5	203	689.636	1341.36	823.082
2017Early	M	T5	204	887.168	1605.62	1034.72
2017Early	M	T6	205	745.062	1409.61	829.793
2017Early	M	T6	206	752.568	1147.13	644.405
2017Early	M	T6	207	675.752	1136.61	488.344
2017Early	M	T7	208	724.17	1287.62	646.01
2017Early	M	T7	209	636.556	1366.04	856.026
2017Early	M	T7	210	1221.62	1371.9	664.678
2017Early	M	T8	211	730.788	1383.81	793.631
2017Early	M	T8	212	774.784	1156.67	478.8
2017Early	M	T8	213	905.356	1381.66	798.862
2017Early	M	T9	214	683.224	1528.6	632.485
2017Early	M	T9	215	674.62	1173.05	508.032
2017Early	M	T9	216	692.444	1399.12	730.13
2017LATE	T	T1	325	33.744	300.563	149.778
2017LATE	T	T1	326	42.408	267.823	132.072
2017LATE	T	T1	327	95.646	348.817	119.234
2017LATE	T	T2	328	70.794	374.634	150.841
2017LATE	T	T2	329	90.972	465.168	139.957
2017LATE	T	T2	330	111.264	439.254	139.957
2017LATE	T	T3	331	93.366	415.826	198.512
2017LATE	T	T3	332	126.654	451.326	170.186
2017LATE	T	T3	333	94.278	376.998	202.739
2017LATE	T	T4	334	217.398	486.671	220.815
2017LATE	T	T4	335	69.768	384.656	178.629
2017LATE	T	T4	336	90.06	439.15	198.072
2017LATE	T	T5	337	114.912	396.395	207.445
2017LATE	T	T5	338	125.742	442.84	173.768
2017LATE	T	T5	339	102.258	486.916	235.285
2017LATE	T	T6	340	101.232	371.771	191.769
2017LATE	T	T6	341	119.586	410.148	186.454
2017LATE	T	T6	342	45.486	434.576	26.7995
2017LATE	T	T7	343	61.56	398.393	188.307
2017LATE	T	T7	344	52.896	415.888	43.694
2017LATE	T	T7	345	95.532	425.374	146.383
2017LATE	T	T8	346	186.048	462.844	253.561
2017LATE	T	T8	347	141.132	459.589	201.872
2017LATE	T	T8	348	69.198	430.833	30.5866
2017LATE	T	T9	349	128.592	415.083	215.332
2017LATE	T	T9	350	75.354	363.265	182.029
2017LATE	T	T9	351	137.712	396.688	152.93
2017LATE	B	T1	352	535.572	735.41	409.951
2017LATE	B	T1	353	498.636	645.073	329.404
2017LATE	B	T1	354	554.268	786.887	295.091
2017LATE	B	T2	355	456	889.363	504.339
2017LATE	B	T2	356	825.816	1057.79	431.127
2017LATE	B	T2	357	758.1	1000.61	594.414
2017LATE	B	T3	358	825.36	960.394	604.979
2017LATE	B	T3	359	762.204	1015.71	636.096
2017LATE	B	T3	360	774.516	877.667	583.447
2017LATE	B	T4	361	606.024	1043.34	618.596
2017LATE	B	T4	362	651.168	917.971	586.503
2017LATE	B	T4	363	750.12	997.671	601.786
2017LATE	B	T5	364	435.936	917.083	575.638
2017LATE	B	T5	365	800.508	1006.93	611.391
2017LATE	B	T5	366	610.128	1050.55	649.993
2017LATE	B	T6	367	449.844	875.91	579.248
2017LATE	B	T6	368	751.032	955.392	620.546
2017LATE	B	T6	369	788.196	1019.24	499.151
2017LATE	B	T7	370	574.788	931.416	580.807
2017LATE	B	T7	371	731.424	987.545	480.514
2017LATE	B	T7	372	800.508	988.126	586.87
2017LATE	B	T8	373	603.972	1022.17	712.366
2017LATE	B	T8	374	668.952	1024.18	668.568
2017LATE	B	T8	375	759.924	1016.02	489.071
2017LATE	B	T9	376	621.528	957.19	603.186
2017LATE	B	T9	377	623.58	872.305	567.867
2017LATE	B	T9	378	694.944	941.204	505.869
2017LATE	F	T1	379	1496.14	908.473	589.955
2017LATE	F	T1	380	814.872	791.903	465.853
2017LATE	F	T1	381	680.352	958.047	386.936
2017LATE	F	T2	382	939.588	1088.99	735.699
2017LATE	F	T2	383	1685.15	1280.1	764.05
2017LATE	F	T2	384	896.04	1211.25	892.092
2017LATE	F	T3	385	1114.24	1165.69	875.962
2017LATE	F	T3	386	1431.84	1230.35	943.908
2017LATE	F	T3	387	1051.31	1067.59	838.643
2017LATE	F	T4	388	1192.21	1256.57	868.956
2017LATE	F	T4	389	1159.61	1121.16	859.949
2017LATE	F	T4	390	1123.13	1210.65	860.261
2017LATE	F	T5	391	963.528	1118.62	828.983
2017LATE	F	T5	392	797.772	1221.72	889.756
2017LATE	F	T5	393	667.584	1262.56	908.047
2017LATE	F	T6	394	979.716	1073.57	841.715
2017LATE	F	T6	395	1224.13	1163.76	917.44
2017LATE	F	T6	396	1648.44	1241.51	811.679
2017LATE	F	T7	397	763.572	1135.08	848.22
2017LATE	F	T7	398	1304.39	1204.09	763.898
2017LATE	F	T7	399	897.636	1202.02	877.418
2017LATE	F	T8	400	559.056	1233.71	1016.35
2017LATE	F	T8	401	944.376	1236.84	976.097
2017LATE	F	T8	402	1284.1	1238.19	787.973
2017LATE	F	T9	403	1182.86	1165.99	864.523
2017LATE	F	T9	404	814.188	1072.78	829.372
2017LATE	F	T9	405	1408.81	1153.87	736.48
2017LATE	M	T1	406	1189	1307.36	755.975
2017LATE	M	T1	407	1299.5	1075.68	589.428
2017LATE	M	T1	408	1109.5	1334.85	373.134
2017LATE	M	T2	409	1337.5	1539.29	910.253
2017LATE	M	T2	410	1479	1691.58	1079.42
2017LATE	M	T2	411	1698	1576.88	1141.93
2017LATE	M	T3	412	1400	1530.39	1119.11
2017LATE	M	T3	413	1518.5	1697.28	1227.06
2017LATE	M	T3	414	1514	1407.82	1068.32
2017LATE	M	T4	415	1304	1767.07	1015.24
2017LATE	M	T4	416	1325	1509.87	1110.83
2017LATE	M	T4	417	1451.5	1678.97	1035.78
2017LATE	M	T5	418	1359	1579.51	1079.54
2017LATE	M	T5	419	1404	1693.28	1063.5
2017LATE	M	T5	420	1585.5	1663.46	1036.96
2017LATE	M	T6	421	1660	1546.4	1089.44
2017LATE	M	T6	422	1483.5	1604.26	1224.77
2017LATE	M	T6	423	1441.5	1764.08	1097.13
2017LATE	M	T7	424	1493	1548.39	1107.58
2017LATE	M	T7	425	1422.5	1630.83	968.229
2017LATE	M	T7	426	1433	1644.03	1128.89
2017LATE	M	T8	427	1549	1653.13	1303.32
2017LATE	M	T8	428	1655.5	1635.12	1256.61
2017LATE	M	T8	429	1624	1745.48	1021.41
2017LATE	M	T9	430	1301	1649.49	1107.98
2017LATE	M	T9	431	1320	1564.52	1075.51
2017LATE	M	T9	432	1944	1692.93	908.903
